# Supplementary material for: Structural and genetic analysis of neutralizing antibodies reveals mechanisms of GII.4 norovirus antigenic evolution
Source: Research Square preprint supplement (doi:10.21203/rs.3.rs-9077120/v1), 2026-03-31
Supplement: Supplementary file 1 [file e41402280f2a46e6e4676699.pdf]

# Figure S1

**a**

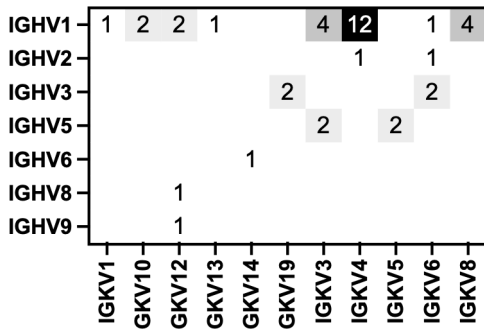

**b**

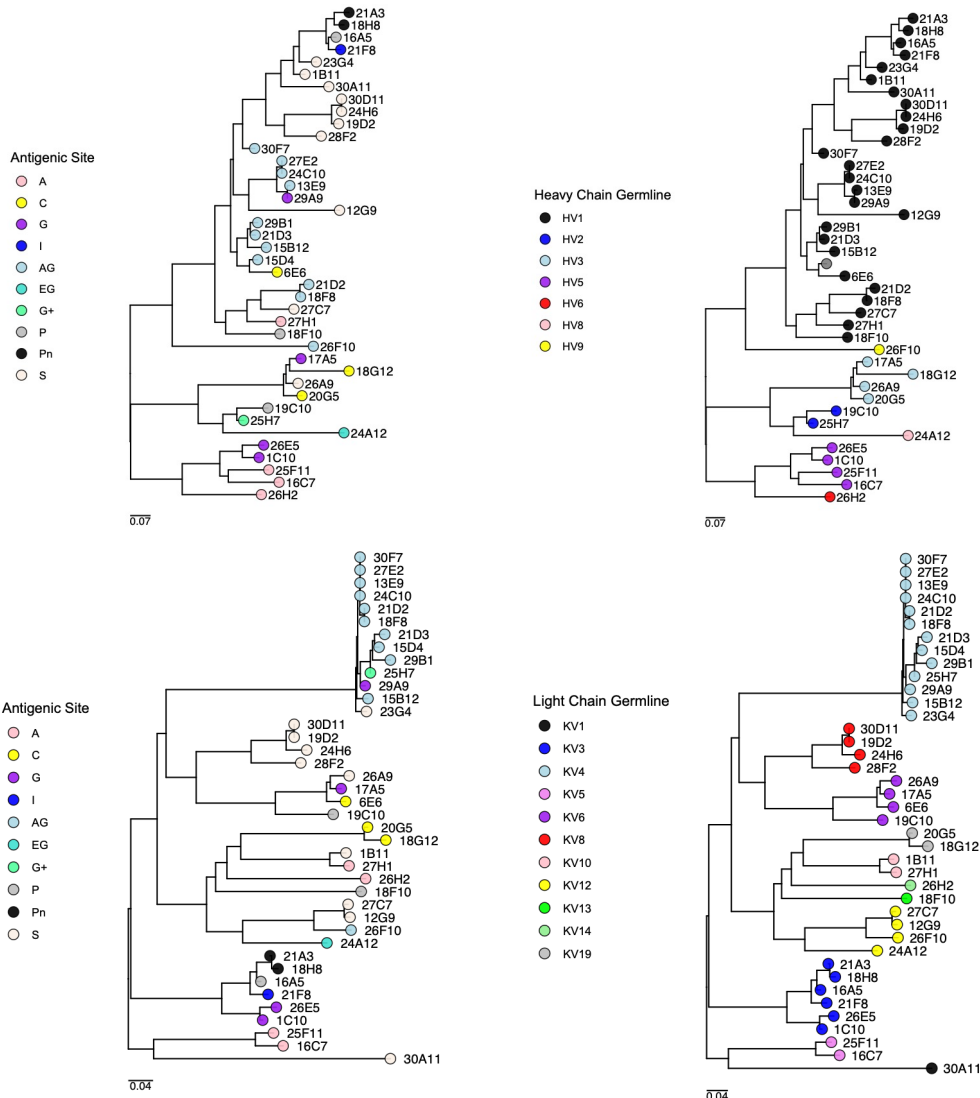

Figure S2

**a**

Norovirus P domain – Fab 17A5  
 $K_D = 97.7 \pm 0.2$  nM

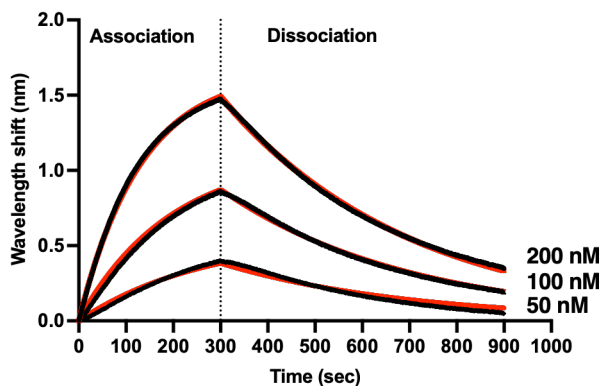

Norovirus P domain – Fab 24C10  
 $K_D = 4.1 \pm 1.1$  nM

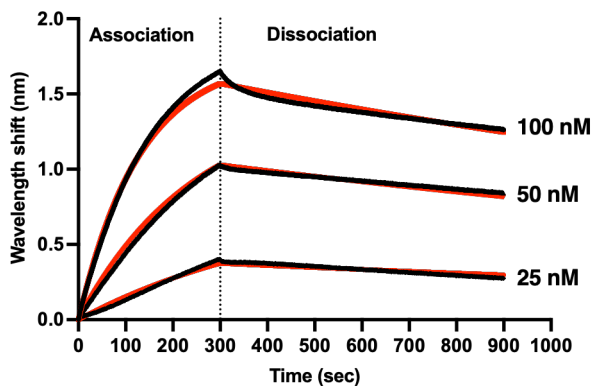

**b**

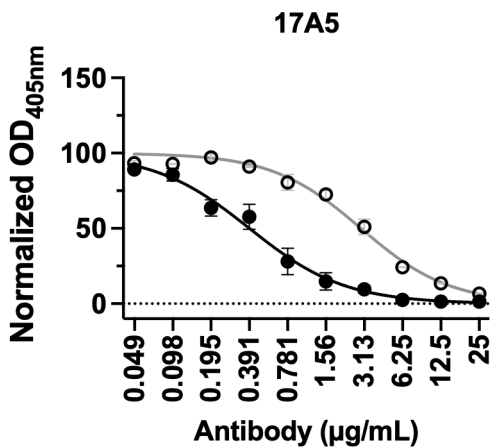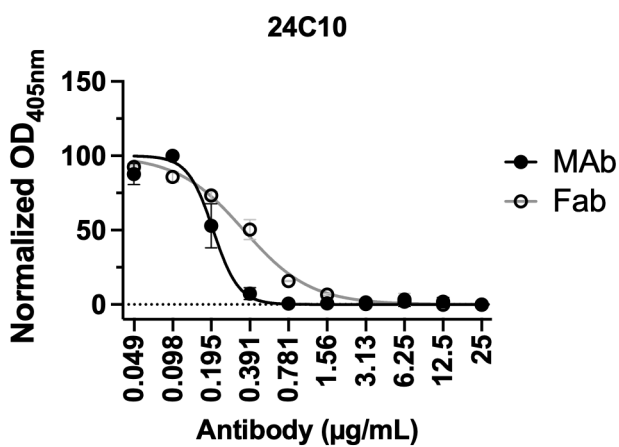

**c**

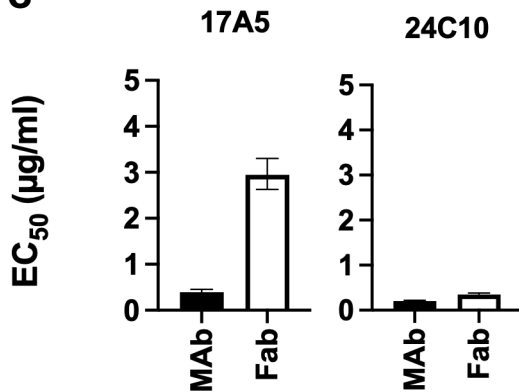

# Figure S3

**a**

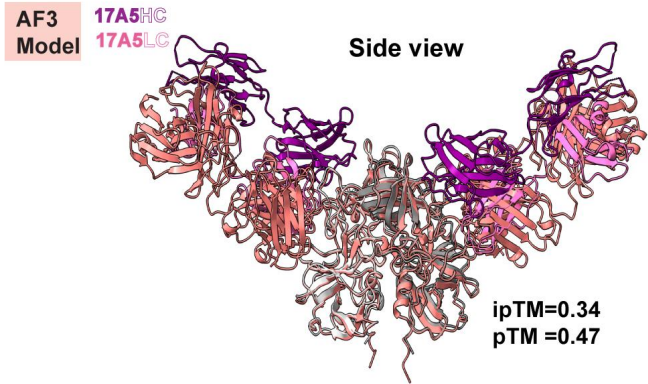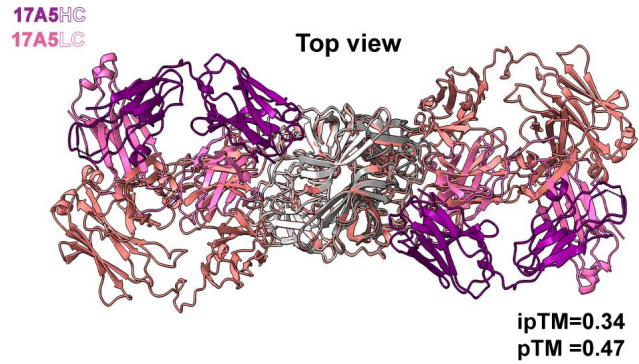

**b**

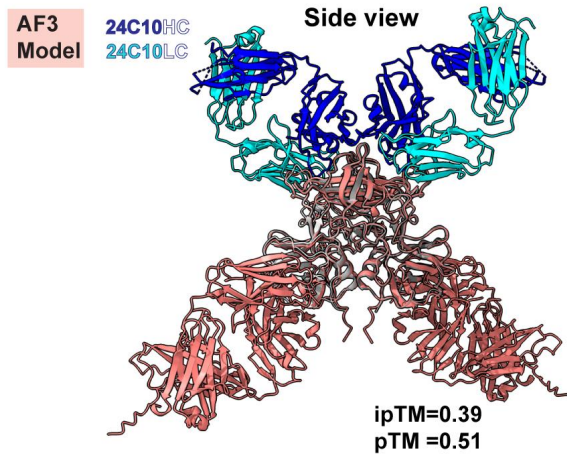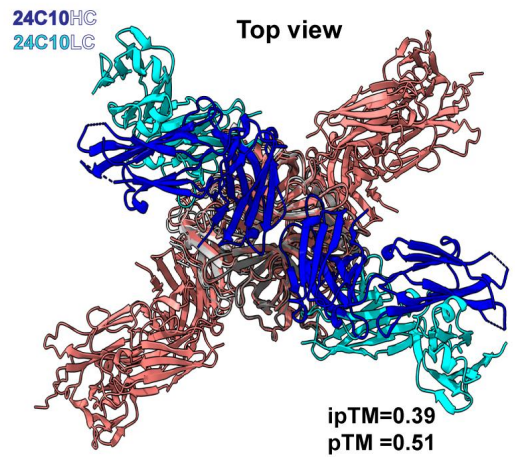

# Figure S4

| Viruses (GenBank Acc/Strain/Year/Var) | Antigenic Site A |          |          |          |          |          |          | Antigenic Site G |          |          |          |          | ELISA Results |          |      |       |
|---------------------------------------|------------------|----------|----------|----------|----------|----------|----------|------------------|----------|----------|----------|----------|---------------|----------|------|-------|
|                                       | 294              | 295      | 296      | 297      | 298      | 368      | 372      | 373              | 352      | 355      | 356      | 357      | 359           | 364      | 17A5 | 24C10 |
| <b>KY424328/RockvilleD1/2012/SY</b>   | <b>T</b>         | <b>G</b> | <b>S</b> | <b>R</b> | <b>N</b> | <b>E</b> | <b>D</b> | <b>H</b>         | <b>Y</b> | <b>S</b> | <b>A</b> | <b>D</b> | <b>A</b>      | <b>R</b> | +    | +     |
| JX023286/CHDC5191/1974                | G                | I        | .        | H        | D        | T        | N        | N                | S        | .        | V        | H        | T             | S        |      |       |
| AY032605/MD145/1987/CA                | V                | .        | .        | H        | D        | T        | N        | N                | S        | .        | V        | H        | T             | S        |      |       |
| AJ004864/Grimbsby/1995/GR             | A                | .        | .        | H        | D        | T        | N        | N                | S        | .        | V        | H        | I             | S        |      |       |
| AF080556/Arizona/1996/GR              | A                | .        | .        | H        | D        | T        | N        | N                | S        | .        | V        | H        | T             | S        |      |       |
| DQ658413/MD3/2004/FH                  | A                | D        | T        | H        | .        | N        | N        | N                | S        | D        | V        | H        | T             | S        |      |       |
| AB294781/Awa/2004/FH                  | A                | .        | T        | H        | .        | N        | N        | N                | S        | D        | V        | H        | T             | S        |      |       |
| AY588022/Oxford/2003/FH               | A                | .        | T        | H        | .        | N        | N        | N                | S        | D        | V        | H        | T             | S        |      |       |
| EU078414/Cumberland/2004/HT           | A                | .        | T        | Q        | .        | S        | S        | N                | S        | .        | V        | H        | T             | S        |      |       |
| AB303941/Nijmegen/2004/HT             | A                | .        | T        | Q        | .        | S        | S        | N                | S        | .        | I        | H        | T             | S        |      |       |
| JX459599/SG4091/2007/HT               | A                | .        | .        | Q        | T        | S        | S        | T                | S        | .        | .        | Y        | T             | S        |      |       |
| EF126963/Yerseke/2006/YE              | A                | .        | T        | Q        | E        | S        | S        | N                | S        | .        | V        | H        | T             | .        |      |       |
| EU921348/Pune/2006/YE                 | A                | .        | T        | Q        | E        | S        | S        | N                | S        | .        | V        | N        | T             | .        |      |       |
| AB294789/Kashiwa/2006/YE              | A                | .        | T        | Q        | E        | S        | S        | N                | S        | .        | V        | H        | T             | .        |      |       |
| AB220922/Sakai/2005/SA                | P                | .        | T        | .        | T        | A        | .        | N                | S        | .        | V        | .        | T             | S        |      | +     |
| EF126965/DenHaag/2006/DH              | A                | .        | .        | .        | .        | S        | E        | N                | .        | .        | .        | P        | T             | S        |      | +     |
| AB541218/Aomori/2007/DH               | A                | .        | .        | .        | .        | S        | E        | N                | .        | .        | .        | P        | T             | S        |      | +     |
| KX354081/Oregon/2012/DH               | A                | .        | .        | .        | .        | G        | E        | N                | .        | .        | .        | .        | T             | S        | +    | +     |
| AB434770/Osaka/2007/OS                | A                | .        | .        | .        | .        | A        | .        | N                | L        | .        | .        | .        | .             | .        |      |       |
| AB541274/Iwate/2008/AP                | .                | .        | .        | .        | .        | A        | .        | N                | .        | .        | .        | .        | .             | .        | +    | +     |
| KX353958/Virginia/2010/NO             | P                | .        | .        | .        | .        | A        | .        | N                | .        | .        | .        | .        | S             | .        | +    | +     |
| KF060086/NSW675N/2012/NO              | S                | .        | .        | .        | .        | A        | .        | N                | .        | .        | .        | .        | S             | .        | +    | +     |
| AB933752/Ehime/2009/NO                | A                | .        | .        | .        | .        | A        | .        | N                | .        | .        | .        | .        | S             | .        | +    | +     |
| JX459908/NSW0514/2012/SY              | .                | .        | .        | .        | .        | .        | .        | R                | .        | .        | .        | .        | .             | .        | +    | +     |
| MW305623/Arg12866/2014/SY             | .                | .        | .        | .        | .        | .        | .        | .                | .        | .        | .        | .        | .             | .        | +    | +     |
| MW506849/Gabon561/2018/SF             | A                | .        | T        | H        | .        | A        | T        | N                | .        | .        | N        | .        | .             | .        | +    |       |
| MN400355/HongKong/2019/HK             | A                | .        | T        | .        | Q        | G        | E        | D                | S        | A        | .        | .        | .             | N        | +    |       |

# Figure S5

**a**

**Variant Circulation**

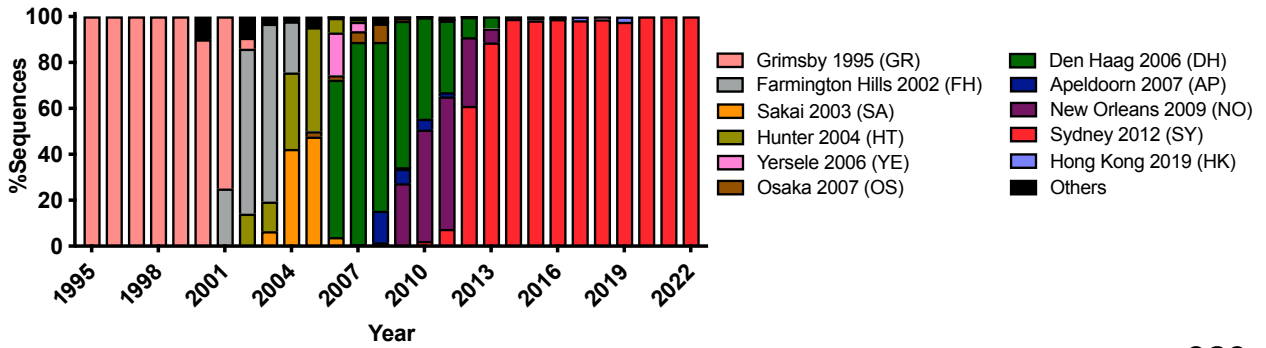

**b**

**Mutational Pattern of Residue 329**

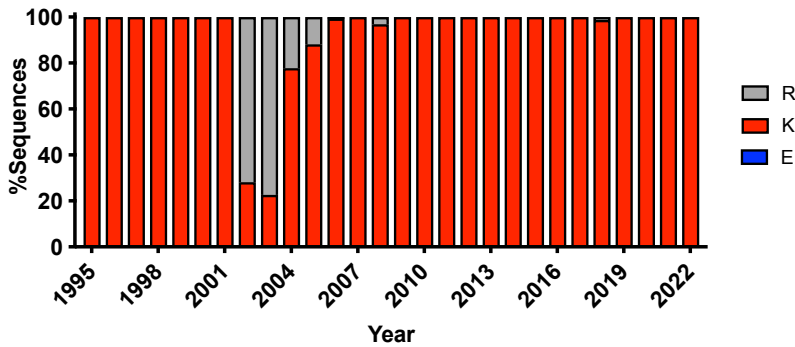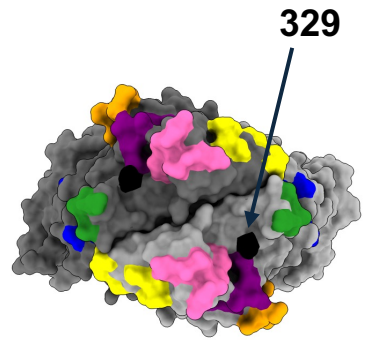

Major antigenic sites

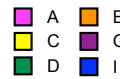

**c**

**Mutational Pattern Residues 352/368**

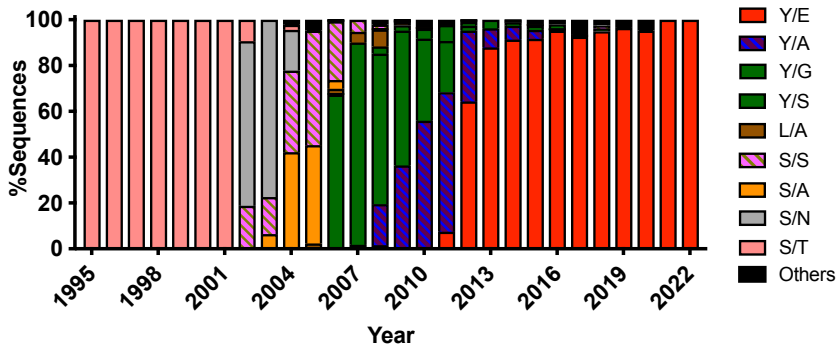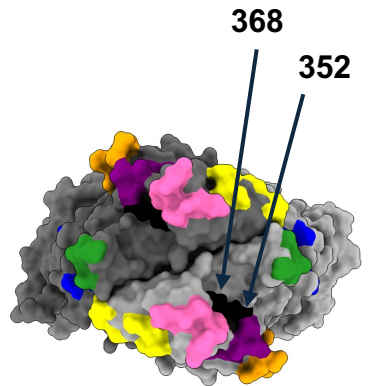

Major antigenic sites

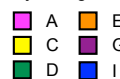

# Figure S6

**a**

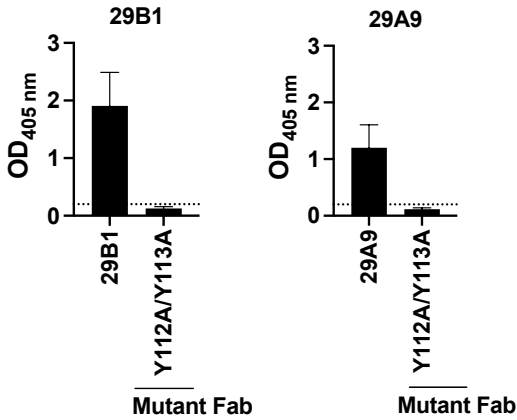

**b**

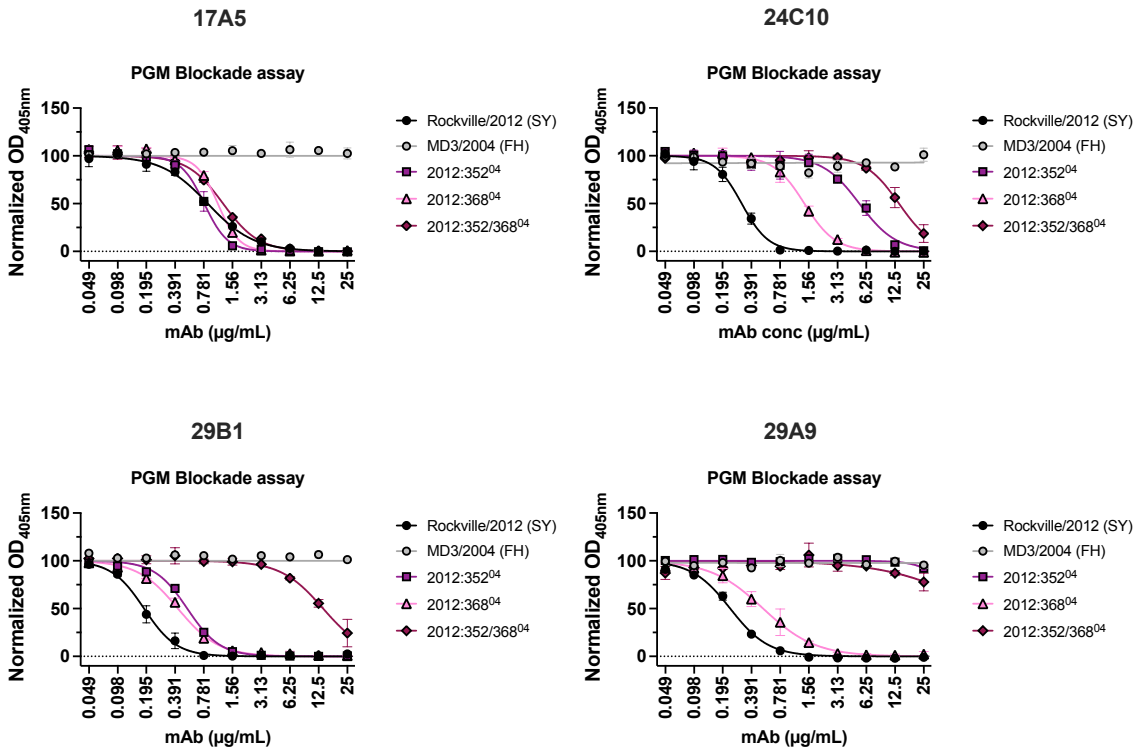

# Figure S7

**a**

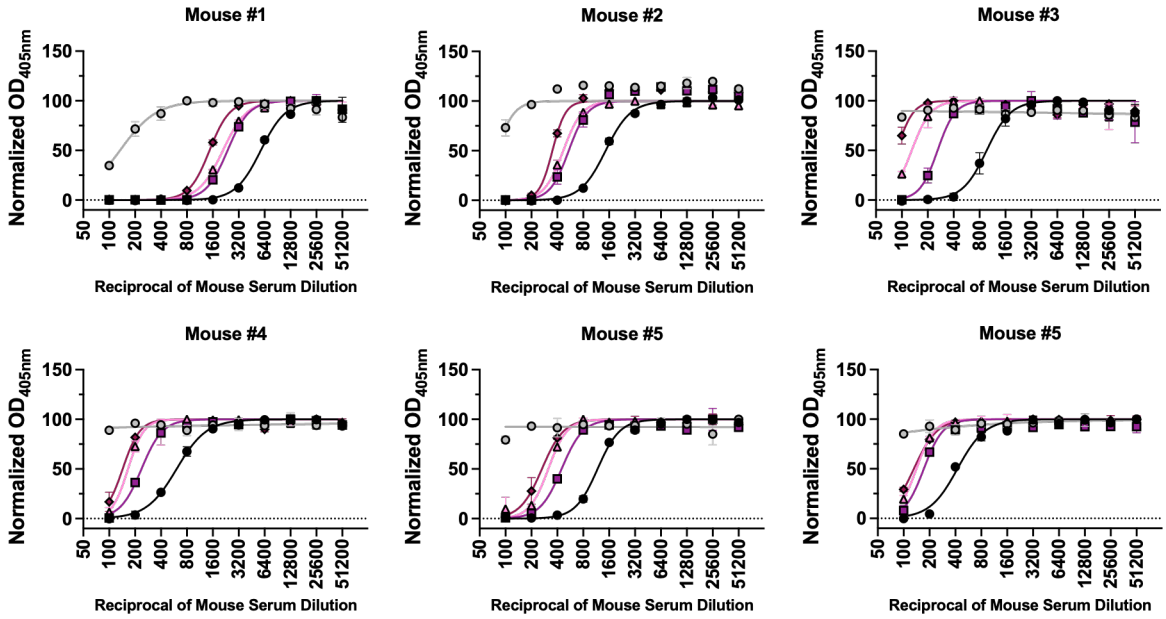

**b**

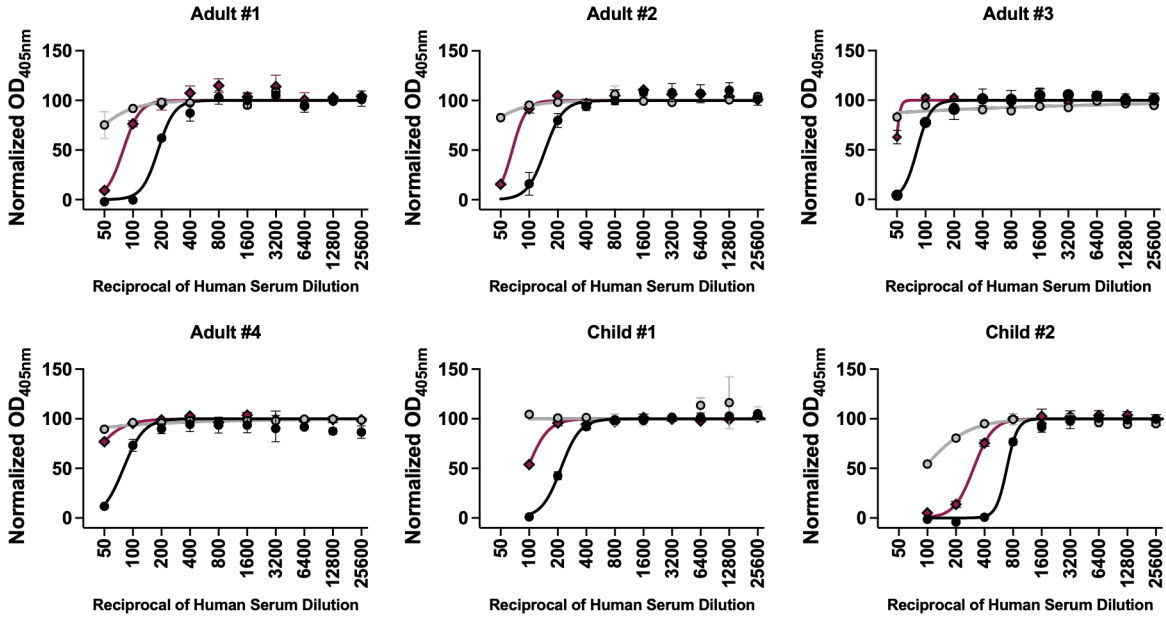

**VLPs**

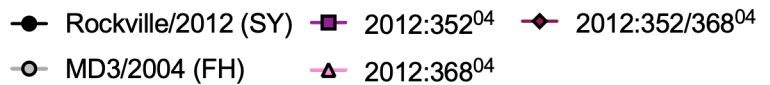

# Figure S8

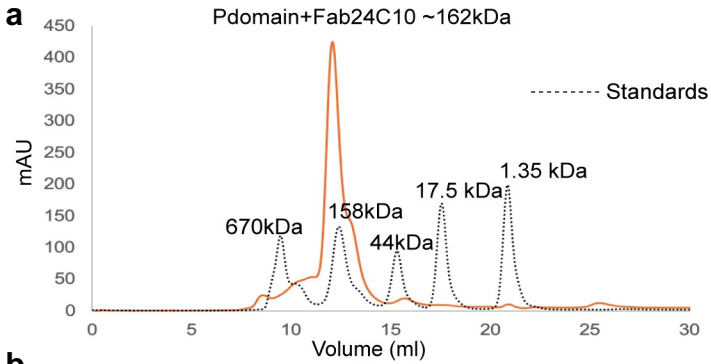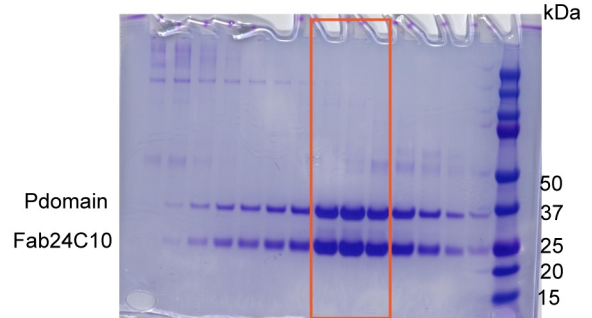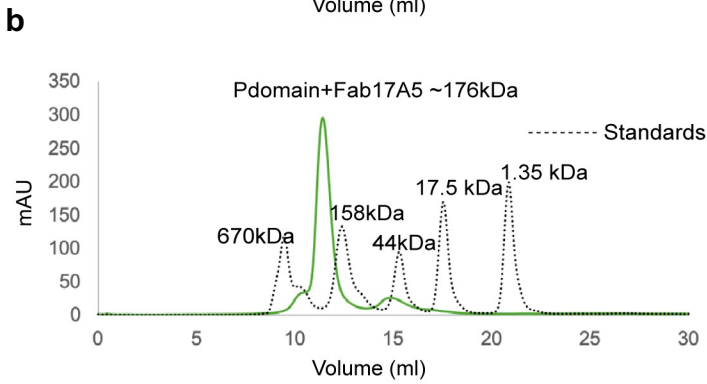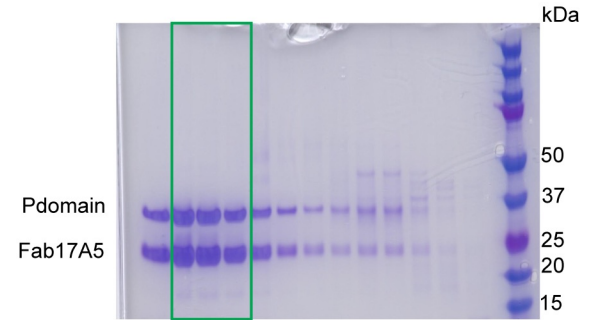

**Table S1. Antibody germlines and CDRH3 sequence**

| Antibody<br>_Antigenic Site | Germline Heavy   | Germline Light     | CDRH3              |
|-----------------------------|------------------|--------------------|--------------------|
| 16C7_A                      | IGHV5-6-2*01 F   | IGKV5-48*01 F      | CVRHG-----DDALDYW  |
| 25F11_A                     | IGHV5-6-3*01 F   | IGKV5-48*01 F      | CARAT-----TVVGDYW  |
| 26H2_A                      | IGHV6-7-4*01 F   | IGKV14-111*01 F    | CCAYY-----RYLL     |
| 27H1_A                      | IGHV1-18*04 F    | IGKV10-96*01 F     | CARPDYD-GAWFA--YW  |
| 6E6_C                       | IGHV1-47-14*01 F | IGKV6-23*01 F      | CTR-FGN---WYFYDYW  |
| 18G12_C                     | IGHV3-8*02 F     | IGKV19-93*01 F     | CARR--KGR--SLFDYW  |
| 20G5_C                      | IGHV3-1*02 F     | IGKV19-93*01 F     | CARS-REYV--NLFAYW  |
| 1C10_G                      | IGHV5-6-5*01 F   | IGKV3-5*01 F       | CARDANYGNYRDAMDYW  |
| 17A5_G                      | IGHV3-1*02 F     | IGKV6-23*01 F      | CAR----EV--TVFEYW  |
| 26E5_G                      | IGHV5-6-5*01 F   | IGKV3-5*01 F       | CAREGYYGSSPYFDYW   |
| 29A9_G                      | IGHV1-9*02 F     | IGKV4-59*01 F      | CARAYYGN--YYAMDYW  |
| 21F8_I                      | IGHV1-4*02 F     | IGKV3-4*01 F       | CARRGAFG---NSFTYW  |
| 15B12_AG                    | IGHV1-69-5*01 F  | IGKV4-59*01 F      | CARSYSSGLPPYAMDQW  |
| 15D4_AG                     | IGHV1-47-14*01 F | IGKV4-59*01 F      | CTR-VYEGYPYAMDYW   |
| 18F8_AG                     | IGHV1-42*04 F    | IGKV4-59*01 F      | CA-TSWGGGDYYAMNYW  |
| 21D2_AG                     | IGHV1-42*04 F    | IGKV4-59*01 F      | CA-TSWGGGDYYAMNYW  |
| 21D3_AG                     | IGHV1-69-5*01 F  | IGKV4-59*01 F      | CARSFD-GYPYAMDYW   |
| 24A12_EG                    | IGHV8-13-3*01 F  | IGKV12-98*01 F     | CARMGGNSN-YYAMDSW  |
| 24C10_AG                    | IGHV1-9*02 F     | IGKV4-59*01 F      | CARSWGFP--YYAIDYW  |
| 25H7_G+others               | IGHV2-6-4*01 F   | IGKV4-59*01 F      | CARSIYDGYPYAMDYW   |
| 26F10_AG                    | IGHV9-2-1*01 F   | IGKV12-41*01 F     | CARSRYG--SSYPAYW   |
| 29B1_AG                     | IGHV1-69-5*01 F  | IGKV4-59*01 F      | CARSFD-GYPYGLDYW   |
| 13E9_AG                     | IGHV1-9*02 F     | IGKV4-59*01 F      | CARIYYGN--YYAMDYW  |
| 27E2_AG                     | IGHV1-9*02 F     | IGKV4-59*01 F      | CARSWGFP--YYAIDYW  |
| 30F7_AG                     | IGHV1-69*02 F    | IGKV4-59*01 F      | CARTLGLP--YYAMDYW  |
| 16A5_P                      | IGHV1-4*02 F     | IGKV3-4*01 F       | CARRGAFG---NSFAYW  |
| 18F10_P                     | IGHV1-18-23*01 F | IGKV13-84*01 F     | CTRSFTTATYYAMDYW   |
| 19C10_P                     | IGHV2-9*02 F     | IGKV6-17*01 F      | CARG--DG---YDFTYW  |
| 18H8_Pn                     | IGHV1-4*02 F     | IGKV3-4*01 F       | CARRG-YG---NYLTYW  |
| 21A3_Pn                     | IGHV1-4*02 F     | IGKV3-4*01 F       | CARRG-YG---NYLTYW  |
| 12G9_S                      | IGHV1-18-17*01 F | IGKV12-44*01 F     | CARHDGYG----YFDVW  |
| 26A9_S                      | IGHV3-1*02 F     | IGKV6-23*01 F      | CARPIYDAP--NYFDYW  |
| 28F2_S                      | IGHV1-47-2*01 F  | IGKV8-27*01 F      | CTRDN-----QAWFAYW  |
| 30A11_S                     | IGHV1-87*02 F    | IGKV1-117*01 F     | CVRRDYYG---DTFDYW  |
|                             |                  | IGKV10-96*01 F, or |                    |
| 1B11_S                      | IGHV1-18-13*01 F | IGKV10-96*07 F     | CATIIY--S---DYFDYW |
| 19D2_S                      | IGHV1-71-11*01 F | IGKV8-30*01 F      | CARTYGYDAEAVPFAYW  |
| 23G4_S                      | IGHV1-18-13*01 F | IGKV4-59*01 F      | CASLI--G---TAFDHW  |
| 27C7_S                      | IGHV1-18*01 F    | IGKV12-44*01 F     | CARAPYDYGIFYD--YW  |
| 24H6_S                      | IGHV1-71-11*01 F | IGKV8-30*01 F      | CARTYGYDDETVPFAYW  |
| 30D11_S                     | IGHV1-71-11*01 F | IGKV8-30*01 F      | CARTYGYDDETVPFAYW  |

**Table S2. Crystallography data collection and refinement**

|                                              | P domain – Fab 17A5       | P domain – Fab 24C10       |
|----------------------------------------------|---------------------------|----------------------------|
| <b>Data Collection<sup>a</sup></b>           |                           |                            |
| PDB Code                                     | 11HB                      | 11HA                       |
| Space group                                  | C121                      | P21                        |
| $\alpha, \beta, \gamma$ (°)                  | 90 91.75 90               | 90, 99.5, 7 90             |
| Resolution (Å)                               | 48.43 - 3.36 (3.4 - 3.36) | 47.78 - 2.70 (2.77 - 2.70) |
| $R_{\text{merge}}$                           | 0.334 (2.594)             | 0.1463 (1.097)             |
| I/sI                                         | 7.4 (1.0)                 | 12.22 (1.24)               |
| Completeness (%)                             | 98.39 (96.65)             | 99.80 (100.00)             |
| Multiplicity                                 | 6.9 (6.9)                 | 13.6 (12.6)                |
| CC <sub>1/2</sub>                            | 0.982 (0.415)             | 0.998 (0.723)              |
| <b>Refinement</b>                            |                           |                            |
| No. of reflections                           | 68516 (2231)              | 49114 (3474)               |
| Resolution (Å)                               | 48.43 - 3.36              | 47.78 - 2.70               |
| $R_{\text{work}}/R_{\text{free}}^{\text{b}}$ | 0.2577 / 0.2996           | 0.2084 / 0.2455            |
| Atoms                                        | 16393                     | 11192                      |
| Protein                                      | 2112                      | 1451                       |
| Water                                        | 0                         | 0                          |
| Mean B factor (Å <sup>2</sup> )              | 104.89                    | 59.52                      |
| Protein (Å <sup>2</sup> )                    | 104.89                    | 59.52                      |
| Water (Å <sup>2</sup> )                      | N/A                       | N/A                        |
| RMSD                                         |                           |                            |
| Bond lengths (Å)                             | 0.002                     | 0.004                      |
| Bond angles (°)                              | 0.5                       | 0.68                       |
| Ramachandran statistics                      |                           |                            |
| Favored (%)                                  | 92.26                     | 96.58                      |
| Allowed (%)                                  | 7.74                      | 3.42                       |
| Outliers (%)                                 | 0                         | 0                          |

<sup>a</sup> The values in parentheses are for the outermost shell.

<sup>b</sup>  $R_{\text{free}}$  is the  $R_{\text{work}}$  based on 10% of the data excluded from the refinement.

**Table S3. GII.4 noroviruses used to make VLPs.**

| <b>Names</b>                 | <b>Accession</b> | <b>Year</b> | <b>Location</b> |
|------------------------------|------------------|-------------|-----------------|
| CHDC5191/1974                | JX023286         | 1974        | United States   |
| MD145/1987 (CA) <sup>a</sup> | AY032605         | 1987        | United States   |
| Grimsby/1995 (GR)            | AJ004864         | 1995        | United Kingdom  |
| Arizona/1996 (GR)            | AF080556         | 1996        | United States   |
| MD3/2004 (FH)                | DQ658413         | 2004        | United States   |
| Awa/2004 (FH)                | AB294781         | 2004        | Japan           |
| Oxford/2003 (FH)             | AY588022         | 2003        | United Kingdom  |
| Cumberland/2004 (HT)         | EU078414         | 2004        | United States   |
| Nijmegen/2004 (HT)           | AB303941         | 2004        | Netherlands     |
| SG4091/2006 (HT)             | JX459599         | 2006        | Singapore       |
| Sakai/2005 (SA)              | AB220922         | 2005        | Japan           |
| Yerseke/2006 (YE)            | EF126963         | 2006        | Netherlands     |
| Kashiwa/2006 (YE)            | AB294789         | 2006        | Japan           |
| Pune/2006 (YE)               | EU921348         | 2006        | India           |
| DenHaag/2006 (DH)            | EF126965         | 2006        | Netherlands     |
| Oregon/2012 (DH)             | KX354081         | 2012        | United States   |
| Aomori/2007 (DH)             | AB541218         | 2007        | Japan           |
| Osaka/2007 (OS)              | AB434770         | 2007        | Japan           |
| Iwate/2008 (AP)              | AB541274         | 2008        | Japan           |
| Virginia/2010 (NO)           | KX353958         | 2010        | United States   |
| NSW675N/2012 (NO)            | KF060086         | 2012        | Australia       |
| Ehime/2009 (NO)              | AB933752         | 2009        | Japan           |
| Rockville/2012 (SY)          | KY424328         | 2012        | United States   |
| Arg12866/2014 (SY)           | MW305623         | 2014        | Argentina       |
| NSW0514/2012 (SY)            | JX459908         | 2012        | Australia       |
| Gabon561/2018 (SF)           | MW506849         | 2018        | Gabon           |
| HongKong/2019 (HK)           | MN400355         | 2019        | Hong Kong       |

<sup>a</sup> Names of the GII.4 variants are abbreviated and indicated within parentheses as follows: Camberwell 1987 (CA), Grimsby 1995 (GR), Farmington Hills 2002 (FH), Sakai 2003 (SA), Hunter 2004 (HT), Yerseke 2006 (YE), Den Haag 2006 (DH), Osaka 2007 (OS), Apeldoorn 2008 (AP), New Orleans 2009 (NO), Sydney 2012 (SY), San Francisco 2017 (SF), Hong Kong 2019 (HK).
